# Piloting a pragmatic clinical audit tool for quality improvement in rural paediatric care in northern Sierra Leone

**Short title: Paediatric admissions and outcomes in a rural hospital in Sierra Leone.**

Muhammed O. Afolabi<sup>1,2</sup>, Philip Ayieko<sup>1,3</sup>, Yusupha Njie<sup>1,2</sup>, Dickens Kowuor<sup>1,2</sup>, Hammed H. Adetola<sup>2</sup>, Bomposseh Kamara<sup>1,2</sup>, Abdulai Berber Jalloh<sup>4</sup>, Ernest Swaray<sup>4</sup>, Lazarus Odeny<sup>2</sup>, Richmonda M. Pearce<sup>5</sup>, Mohamed H. Samai<sup>4</sup>, Gibrilla Fadlu Deen<sup>4</sup>, Songor Koedoyoma<sup>5</sup>, Isaac G. Sesay<sup>5</sup>, David Ishola<sup>1,2</sup>, Bailah Leigh<sup>4</sup>, Deborah Watson-Jones<sup>1,3</sup>, Brian Greenwood<sup>1</sup>

<sup>1</sup>London School of Hygiene & Tropical Medicine, London, United Kingdom

<sup>2</sup>EBOVAC-Salone Project, Kambia, Kambia District, Sierra Leone

<sup>3</sup>Mwanza Intervention Trials Unit, National Institute for Medical Research, Mwanza, Tanzania

<sup>4</sup>College of Medicine and Allied Health Services, University of Sierra Leone, Freetown, Sierra Leone

<sup>5</sup>Kambia Government Hospital, Kambia, Kambia District, Sierra Leone

Corresponding author: Dr Muhammed Afolabi, Department of Disease Control, London School of Hygiene & Tropical Medicine, Keppel Street, London WC1E 7HT. E-mail: [Muhammed.Afolabi@lshtm.ac.uk](mailto:Muhammed.Afolabi@lshtm.ac.uk)

## Abstract

Hospital admissions and their clinical outcomes can reflect the disease burden in a population and can be utilised as effective surveillance and impact monitoring tools. Inadequate documentation of admissions and their outcomes have contributed to the poor quality of paediatric care in many health care settings in sub-Saharan Africa. We have developed and piloted a simple tool for documentation of basic, standardised patient-level information on causes of admissions, diagnoses, treatments and outcomes in patients admitted to the paediatric ward of a district hospital in a rural community in Sierra Leone.

From 1 August 2019 to 31 July 2021, we used this tool to document the admissions, treatments and clinical outcomes of 1,663 children admitted to this hospital. The majority of the children (1015, 62%) were aged between 12-59 months, were boys (942, 57%), were wasted (516, 31%), stunted (238 14%) or underweight (537, 32%). More than half of the children lived more than 1 km distance from the hospital (876/1410, 62%). Most were admitted before 4pm (1171/1626, 72%) and during weekdays (1231/1662, 74%). The highest number of paediatric admissions occurred in November 2019 and the lowest in April 2020. Severe malaria was the leading cause of admission. More than 80% of the children were successfully treated and discharged home (1356/1663, 81.5%) while 122/1663 (7.3%) died. Children aged under-five years who were underweight, and those who presented with danger signs (e.g. signs of breathing difficulty, dehydration, head injury or severe infections) had a higher risk of death than children without these features ( $p<0.01$ ;  $p=0.03$ ;  $p=0.011$  and  $p= 0.009$ , respectively).

Lack of systematic documentation of medical histories and poor record keeping of hospital admissions and outcomes can be overcome by using a simple tool. Continuous use of the tool with regular audits could improve delivery of paediatric care in resource-limited settings.

**Keywords:** Paediatric, morbidities, mortality, rural health care, sub-Saharan Africa

## 55 Introduction

56  
57 Sierra Leone has some of the world's poorest health indicators. In 2020, the infant mortality rate was 80 deaths per  
58 1,000 live births, and the overall under-five mortality rate was 108 deaths per 1,000 live births, [1] placing Sierra  
59 Leone the fourth lowest country in Africa in the ranking of these child health indicators. [2] In the same year, an  
60 estimated 27,336 under-five deaths occurred in the country, largely due to preventable causes. [3] Despite the  
61 progress recorded following the multi-faceted approaches to rebuilding the country's fragile health system which  
62 was weakened by the 11 years of civil war and the 2014-2016 Ebola outbreak [4], improving child survival remains a  
63 major public health challenge in the country. [5]

64 Prompt diagnosis and early provision of appropriate health care are widely recognised as important strategies to  
65 improve child survival. [6] This needs to occur at primary and secondary health care levels. In many Low or Middle  
66 Income Countries (LMIC), there is frequently incomplete documentation of patient admissions and outcomes, [6]  
67 which can hinder appropriate planning and implementation of effective service delivery. [7] Thus, improving  
68 documentation of admissions and outcomes in secondary health care facilities can support impact evaluation,  
69 exploration of links between health system inputs and outcomes and provide critical information on geographical  
70 variations in quality and outcomes of care. [8, 9] In addition, reliable hospital data can provide valuable insights on  
71 the disease burden in a population and can be utilised as effective surveillance and impact monitoring tools. The  
72 data provided by these records can serve as an entry point to the investigation of system weaknesses and failures,  
73 assessment of the quality of health systems and can be used as a prism through which determinants of health  
74 system performance can be interrogated. [8]

75 The scarcity of reliable data on births, deaths and causes of death in many LMIC has led to heavy reliance on  
76 extrapolating data obtained from a few populations that are under demographic surveillance and from verbal  
77 autopsies. [8] More effective use of quality hospital data has been advocated by global health organisations in order  
78 to understand disease burden in a specific community, enabling prioritisation of resource allocations [10] and  
79 facilitating achievement of universal health coverage.

80 Towards addressing this need, we have developed and piloted a simple tool for documentation of basic,  
81 standardised patient-level information on causes of admissions, diagnoses, treatments and outcomes in a paediatric  
82 ward of a district hospital in a rural community in Sierra Leone. In this paper, we describe the pattern of admissions

83 and clinical outcomes of the children admitted to the paediatric ward of the Kambia Government Hospital, Sierra  
84 Leone, using this tool continuously over a two-year period. During this study, the COVID-19 outbreak spread across  
85 Sierra Leone and lockdowns and travel restrictions were imposed by the government as public health measures.  
86 Therefore, we also assessed the impact of the COVID-19 outbreak on the paediatric admissions and outcomes in the  
87 hospital.

## 88 Materials and Methods

### 90 Study population

91 Kambia is located in the north-west region of Sierra Leone, about 200 km from Freetown, the capital city. Kambia is  
92 one of the communities that was heavily affected by the country's civil war (1991-2002) and the West African Ebola  
93 outbreak in 2014-2016. [11] Kambia district has one of the highest childhood morbidities and mortalities among the  
94 14 administrative districts of Sierra Leone. [12] Top amongst the causes of death and illness in children are malaria,  
95 pneumonia and diarrheal diseases. Government primary health care services consist of peripheral health units,  
96 which are run by nurses and community health officers. Remote and rural settlements are served informally by  
97 unregulated mobile drug vendors and traditional practitioners. [13]

98 Kambia Government Hospital (KGH) is the only public health centre providing primary and secondary health care for  
99 a population of more than 60,000 under-five children. [14] The hospital has four wards (adult male, adult female,  
100 paediatric and maternity), one surgical theatre and two outpatient clinic rooms. The paediatric ward is run primarily  
101 by nurses and community health officers. However, at the time of this study, a paediatrician and a paediatric nurse  
102 were employed to provide specialist care for the paediatric ward by the EBOVAC-Salone project which was  
103 evaluating a prophylactic Ebola vaccine regimen (clinicaltrials.gov NCT02509494) in Kambia district. [15, 16] Prior to  
104 the deployment of the tool described in this paper, few records were kept for patients accessing care at the hospital.  
105 Clinical histories and care plans were usually documented in ad-hoc note books procured by parents/caregivers on  
106 arrival at the hospital ward with their sick children. Consequently, paediatric admissions and outcomes were often  
107 incompletely documented in the hospital register. To improve collection of individual patient-level data on hospital  
108 admissions, we developed a simplified, user-friendly, paper-based tool which contained sections covering basic  
109 socio-demographic information of a patient, including age, gender, home address, source of referral, date and time  
110 of admission, chief medical complaints, findings from clinical examinations and tests conducted at admission, results

111 from subsequent clinical and laboratory investigations, working/definitive diagnoses, management and treatment  
112 outcomes. The tool (Supplementary file S1) was pre-tested for validity among health workers who were not involved  
113 in the study and revised to incorporate feedback received from the pre-test. Practical training and demonstrations  
114 on how to use the tool to collect information from parents/care-givers were provided for the hospital staff. Hospital  
115 staff members including nurses and community health workers were also trained on basic medical record keeping  
116 and were helped to set up an analogue medical record unit in the paediatric ward of the hospital. Oversight was  
117 provided by the attending physicians (MOA and HHA) to ensure that the tool was used to collect complete and  
118 legible data in a timely fashion.

### 119 Ethical considerations

120

121 Ethical approvals for the study were obtained from the Research Ethics Committee of the London School of Hygiene  
122 & Tropical Medicine and the Sierra Leone Ethics and Scientific Review Committee. Written permission for the study  
123 was obtained from the Management of the Kambia Government Hospital, an arm of the Sierra Leone Ministry of  
124 Health and Sanitation. Written informed consent was obtained from the parents/care-givers before the tool was  
125 used to collect their child's health information. In addition, assent was obtained from children aged seven years and  
126 above. Personal data collected about the hospitalised children were anonymised, kept confidential and held in  
127 compliance with international data privacy protection laws and regulations.

### 128 Statistical analysis

129

130 Hospital data collected during the implementation period were double-entered in an OpenClinica database at the  
131 Kambia COMAHS/LSHTM research centre, cleaned and then analysed using descriptive and inferential statistics. All  
132 statistical analyses were conducted using Stata 16 Statistical Software (Stata Corp, USA). Information on the clinical  
133 indices (presentations, investigations, interventions, complications, and outcomes) and service indices (such as the  
134 duration of admission) were represented through graphical charts. We used Chi squared tests to evaluate the  
135 associations between individual characteristics of the hospitalised children during the study and categorised the  
136 clinical outcomes into four levels – discharged alive, referred, discharged against medical advice by parents and  
137 death during hospitalisation. Unadjusted logistic regression was performed to examine risk factors for death among  
138 paediatric admissions by assessing the association between death and each risk factor in turn. Next, we conducted  
139 multivariable regression analysis for death adjusted for time of the day during which admission occurred, presence

140 of danger signs (such as signs of breathing difficulty, dehydration, head injury and severe infections) during  
141 admission and weight-for-age and weight-for-height Z scores which had shown significant associations with mortality  
142 in the unadjusted logistic regression, based on two-tailed p value cut-off < 0.05.

## 143 Results

144

145 We administered the tool from 1 August 2019 to 31 July 2021 to a total of 1663 children out of 2068 children  
146 admitted into the ward during the same period, representing an 80% response rate. The main reason for failure to  
147 administer the tool to all admitted children during this period was an early discharge from the hospital before  
148 consent could be obtained from the parents/caregivers.

### 149 Characteristics of hospitalised children

150

151 Table 1 summarises the socio-demographic characteristics of the 1663 children enrolled into the study. Overall, 1015  
152 (62%) were aged 12-59 months and 942 (57%) were boys. Less than 10% of the children (112, 9%) were severely  
153 malnourished based on the mid-upper arm circumference (MUAC) measurements of <11.5cm, while 516 (31%) were  
154 wasted, 238 (14%) were stunted and 537 (32%) were underweight. Over half of the children lived more than 1  
155 kilometre from the hospital (876/1410, 62%), and most were admitted before 4pm (1171/1626; 72%) and during  
156 weekdays (1231/1662; 74%).

157

158

159

160

161

162

163

164

165

166  
167

**Table 1: Socio-demographic characteristics of study participants, KGH, 2019-2021**

|                                | <b>N = 1663</b> |
|--------------------------------|-----------------|
|                                | <b>n (%)</b>    |
| Age groups                     |                 |
| 0-27 days (neonates)           | 141(9)          |
| 1-<12 months (infants)         | 312(19)         |
| 12-59 months                   | 1015(62)        |
| 5-14 years                     | 181(11)         |
| Sex                            |                 |
| Male                           | 942(57)         |
| Female                         | 720(43)         |
| MUAC                           |                 |
| Below 11.5cm                   | 112(9)          |
| Above 11.5cm                   | 1148(91)        |
| WFA                            |                 |
| < -2 SD                        | 516(31)         |
| >-2 SD                         | 1006(60)        |
| Missing                        | 141(8)          |
| HFA                            |                 |
| < -2 SD                        | 238(14)         |
| >-2 SD                         | 1144(69)        |
| Missing                        | 281(17)         |
| WFH                            |                 |
| < -2 SD                        | 537(32)         |
| >-2 SD                         | 510(31)         |
| Missing                        | 616(37)         |
| *Proximity of residence to KGH |                 |
| Within 1 km                    | 534(38)         |
| More than 1 km                 | 876(62)         |
| †Time of admission             |                 |
| Before 4 pm                    | 1171(72)        |
| After 4 pm                     | 455(28)         |
| Admission day                  |                 |
| During weekdays                | 1231(74)        |
| During weekends                | 431(26)         |
| Sources of referral            |                 |
| Within KGH                     | 114(7)          |
| Self/parent referred           | 1069(64)        |
| Other facility                 | 478(29)         |

168  
169  
170  
171  
172  
173

WFA = Weight-for-age; HFA= Height-for-age; WFH = Weight-for-height

\*Number of children whose home addresses were correctly provided by parents/caregivers = 1410

†Number of children whose times of admission were documented = 1626

## Seasonality of admission

Over the study period, the highest number of admissions was recorded in November 2019 and lowest admissions occurred in April 2020 (Figure 1). These patterns of admissions mirror the changes in the weather conditions in the study area where the dry season typically runs from November to March and the rainy season from April to October with a peak of rainfall in August. However, the seasonal pattern of admissions may have been modified during the audit in 2020 by the COVID-19 pandemic, with the first imported case of COVID-19 reported on 30 March 2020.

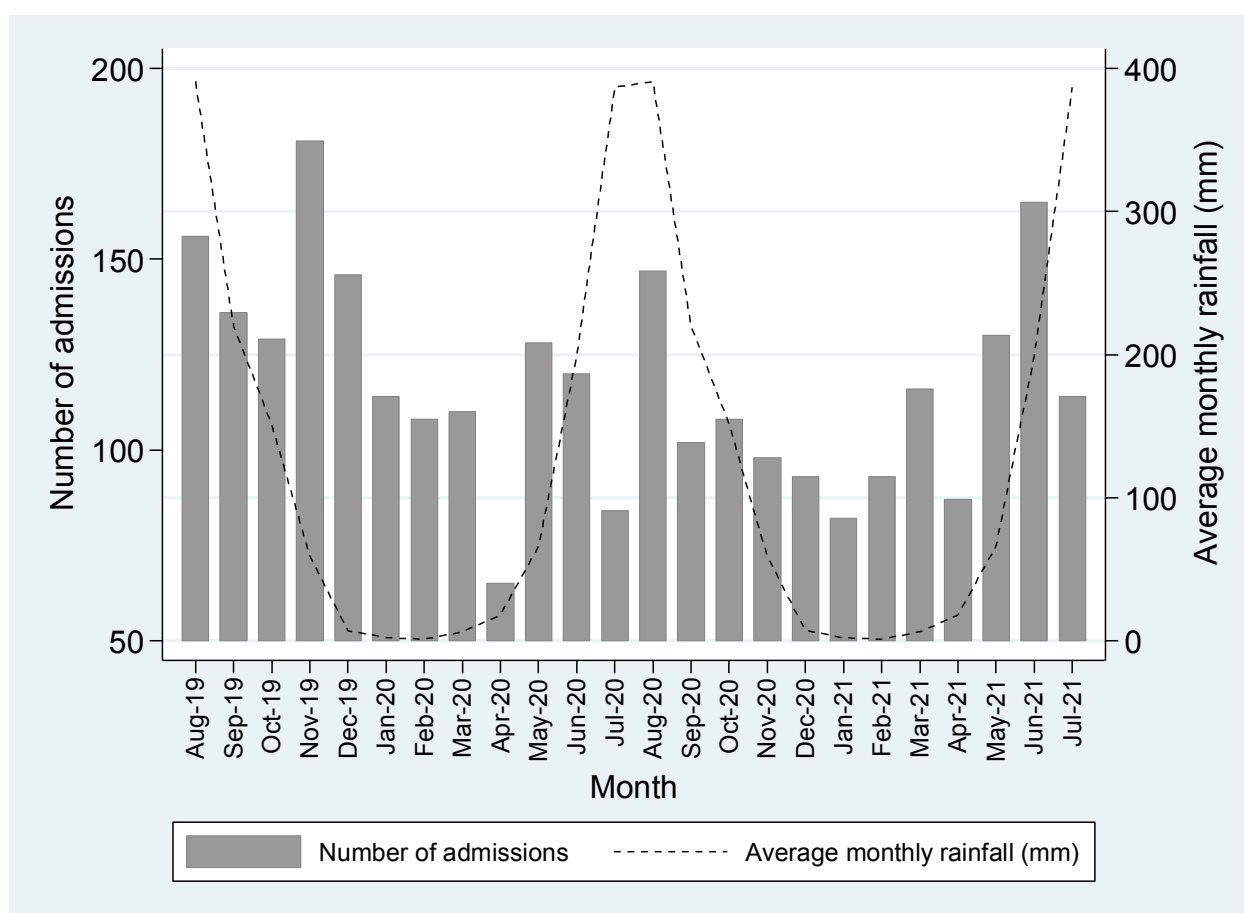

**Figure 1:** Seasonal pattern of admissions to the KGH paediatric ward, Aug 2019-Jul 2021.



## Impact of COVID-19 lockdown

The national lockdowns and restrictions of movements imposed in Sierra Leone in the wake of COVID-19 outbreak had an impact on paediatric admissions. There were two 3-day national lockdowns between 5–7 April and 3–5 May 2020. From 14 April to 4 July, there were movement restrictions within districts across the country. From 22 March to 22 July 2020, international commercial air travel was suspended. [17] During these periods, schools were closed and considerable reductions in paediatric admissions were observed during and around the periods of these lockdowns, with the nadir recorded two weeks after the first national lockdown (Figure 2).

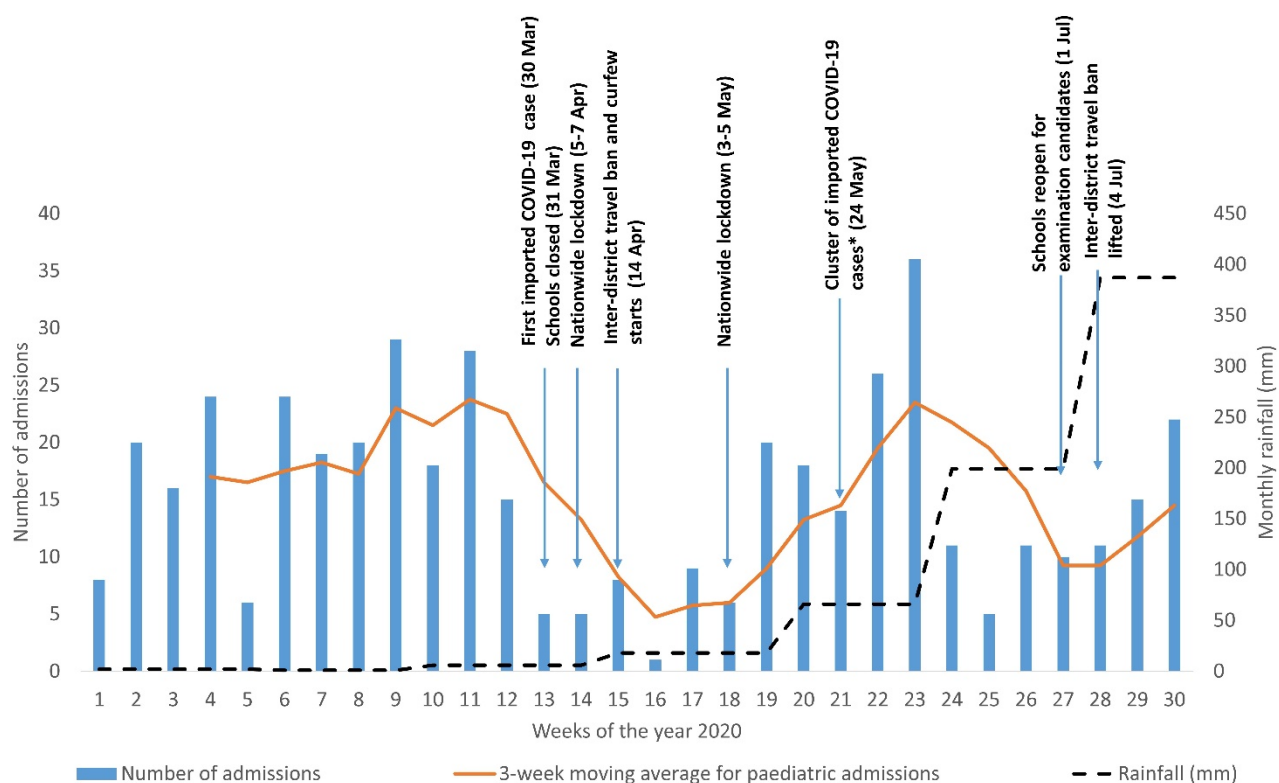

**Figure 2:** Impact of COVID-19 pandemic on admissions among study participants, KGH, 2019-2021

## Admission diagnosis

Out of the 1663 paediatric admissions, 1,053 (63.3%) had a single admission diagnosis; 474 (28.5%) had two co-morbid diagnoses, and 102 (6.1%) had three or more diagnoses. There was no documentation of a diagnosis in the admission records of 34 (2%) participants. After assigning a primary diagnosis for each of the 576 participants with co-morbid illnesses, the most common diagnoses among all participants were malaria 1089 (65%); asphyxia 86 (5%); malnutrition 55 (3%); sepsis 51 (3%); and surgical conditions 51 (3%). The leading clinical phenotypes for malaria were severe malarial anaemia 498 (30% of all admission), severe malaria not meeting other criteria: 383 (23%) and cerebral malaria 106 (6%) [Table 2].

**Table 2: Primary diagnoses among children admitted to KGH, 2019-2021**

|                                                    | Age in years      |                    |                    |                               | Total<br>n (%)   |
|----------------------------------------------------|-------------------|--------------------|--------------------|-------------------------------|------------------|
|                                                    | < 1 year<br>n (%) | 1-4 years<br>n (%) | 5-1 years<br>n (%) | No age<br>documented<br>n (%) |                  |
| <b>Primary admission diagnosis (N = 1663)</b>      |                   |                    |                    |                               |                  |
| Severe malarial anaemia                            | 71 (16)           | 373 (37)           | 52 (29)            | 2 (14)                        | 498 (30)         |
| Severe malaria                                     | 58 (13)           | 267 (26)           | 54 (30)            | 4 (29)                        | 383 (23)         |
| Cerebral malaria                                   | 12 (3)            | 73 (7)             | 21 (12)            | -                             | 106 (6)          |
| Severe malaria with respiratory distress           | -                 | 9 (1)              | 1 (1)              | -                             | 10 (1)           |
| Non-severe malaria                                 | 20 (4)            | 63 (6)             | 8 (4)              | 1 (7)                         | 92 (6)           |
| Asphyxia                                           | 83 (18)           | 1 (0)              | -                  | 2 (14)                        | 86 (5)           |
| Malnutrition                                       | 15 (3)            | 40 (4)             | -                  | -                             | 55 (3)           |
| Sepsis                                             | 33 (7)            | 14 (1)             | 3 (2)              | 1 (7)                         | 51 (3)           |
| Surgical conditions/ burns/ trauma/ accidents      | 6 (1)             | 25 (2)             | 19 (10)            | 1 (7)                         | 51 (3)           |
| Severe pneumonia                                   | 29 (6)            | 12 (1)             | -                  | 1 (7)                         | 42 (3)           |
| Anaemia                                            | 11 (2)            | 27 (3)             | 3 (2)              | -                             | 41 (2)           |
| Acute gastroenteritis                              | 16 (4)            | 22 (2)             | 1 (1)              | -                             | 39 (2)           |
| Febrile convulsion                                 | 4 (1)             | 18 (2)             | 2 (1)              | -                             | 24 (1)           |
| Neonatal sepsis                                    | 19 (4)            | -                  | -                  | 1 (7)                         | 20 (1)           |
| Prematurity                                        | 12 (3)            | -                  | -                  | -                             | 12 (1)           |
| Non-severe pneumonia                               | 9 (2)             | 2 (0)              | -                  | -                             | 11 (1)           |
| HIV                                                | 1 (0)             | 6 (1)              | -                  | -                             | 7 (0)            |
| Other infectious diagnoses                         | 18 (4)            | 11 (1)             | 8 (4)              | -                             | 37 (2)           |
| Other non-infectious diagnoses                     | 13 (3)            | 18 (2)             | 4 (2)              | -                             | 35 (2)           |
| > 1 diagnosis but primary diagnosis not determined | 14 (3)            | 11 (1)             | 3 (2)              | 1 (7)                         | 29 (2)           |
| Diagnosis not documented                           | 9 (2)             | 23 (2)             | 2 (1)              | -                             | 34 (2)           |
| <b>Total</b>                                       | <b>453(100)</b>   | <b>1015(100)</b>   | <b>181(100)</b>    | <b>14(100)</b>                | <b>1663(100)</b> |

Malaria diagnosis using a rapid diagnostic test (RDT) and microscopy was performed on most children admitted to the ward in whom a positive test was obtained in 72.3% (1193/1649). When disaggregated by age group, malaria positivity by RDT and microscopy was highest among children aged 1-4 years (853/1015, 84%), followed by children aged 5-14 years (147/181, 81.2%). Of the 1193 children diagnosed with malaria by RDT and microscopy, 79.8% (952/1193) had severe malaria. Of the 952 children with severe malaria, 553/952 (58.1%) had severe anaemia; prostration was observed in 539/952 (56.6%), cerebral malaria in 147/952 (15.4%), and respiratory distress in 1.6% (15/952) [Table 3]. When disaggregated by age group, prostration, impaired consciousness, multiple

convulsions and cerebral malaria were observed more frequently among 1-4 years old children than among other age groups ( $p < 0.001$ ). Although respiratory distress was disproportionately higher among 1-4 years old children than other age groups, this did not reach statistical significance ( $p = 0.192$ ) [Table 4].

**Table 3:** Malaria diagnosis and severe malaria clinical syndromes according to the age of paediatric admissions at KGH, 2019-2021

|                                            | Age            |                 |                | Total            |
|--------------------------------------------|----------------|-----------------|----------------|------------------|
|                                            | < 1 year       | 1-4 years       | 5-14 years     |                  |
|                                            | n (%)          | n (%)           | n (%)          | n (%)            |
| <b>Number of hospital admissions</b>       | <b>N = 453</b> | <b>N = 1015</b> | <b>N = 181</b> | <b>N = 1649*</b> |
| <b>RDT/ microscopy confirmed malaria</b>   |                |                 |                |                  |
| Positive                                   | 193(42.6)      | 853(84)         | 147(81.2)      | 1193 (72.3)      |
| Negative                                   | 87(19.2)       | 109(10.7)       | 13(7.2)        | 209 (12.7)       |
| Malaria test not done                      | 173(38.2)      | 53(5.2)         | 21(11.6)       | 247 (15.0)       |
| <b>Malaria severity</b>                    | <b>N= 193</b>  | <b>N = 853</b>  | <b>N = 147</b> | <b>N = 1193*</b> |
| Uncomplicated malaria                      | 55(28.5)       | 162(19.0)       | 24(16.3)       | 241 (20.0)       |
| Severe malaria <sup>†</sup>                | 138(71.5)      | 691(81.0)       | 123(83.7)      | 952 (79.8)       |
| <b>Clinical features of severe malaria</b> | <b>N =138</b>  | <b>N = 691</b>  | <b>N = 123</b> | <b>N = 952*</b>  |
| Severe anaemia <sup>‡</sup>                | 77(55.8)       | 415(60.0)       | 61(49.6)       | 553 (58.1)       |
| Prostration                                | 76(55.1)       | 390(56.4)       | 73(59.3)       | 539 (56.6)       |
| Impaired consciousness                     | 45(32.6)       | 302(43.7)       | 55(44.7)       | 402 (42.2)       |
| Multiple convulsions                       | 16(11.6)       | 69(10.0)        | 15(12.2)       | 100 (10.5)       |
| Cerebral malaria                           | 16(11.6)       | 104(15.0)       | 27(22.0)       | 147 (15.4)       |
| Respiratory distress                       | 1(0.7)         | 12(1.72)        | 2(1.7)         | 15 (1.6)         |

\*14 children who did not have documentation of age were not included in analysis for age distribution of malaria diagnosis and for clinical features by age.

<sup>†</sup>Severe malaria defined as acute malaria with signs of organ dysfunction and/or high level of parasitaemia characterised by impaired consciousness, hypoglycaemia, shock, pulmonary oedema, etc

<sup>‡</sup> Severe anaemia is defined by haemoglobin concentration of  $< 5$  g/dl or a haematocrit of  $< 15\%$ .

## Clinical outcomes

More than 80% of the children were treated successfully and discharged home (1356/1663, 81.5%) while 122 (7.3%) died, 93 (5.6%) absconded, and 68 (4.1%) were discharged against medical advice. Reasons for discharge against medical advice included an inability to pay the hospital bills and some children were discharged against medical advice when their parents or guardians perceived that their child was not making satisfactory clinical improvement despite the medical management instituted. Twenty children (1.2%) were referred for further management to the paediatric specialist hospital in Freetown. Referral to the specialist hospital was mainly for the management of surgical conditions such as hernia, severe burns and head injuries following a road traffic accident. Factors that influenced the clinical outcomes among the children admitted to the Kambia hospital included age group ( $p=0.021$ ), weight-for-age ( $p=0.034$ ), proximity of residence to the hospital ( $p=0.052$ ), time of presentation or admission at the hospital ( $p=0.002$ ) and duration of hospital stay ( $p=0.017$ ) [Table 4].

**Table 4. Clinical outcomes of children admitted to the paediatric ward, KGH, 2019-2021**

| Clinical outcomes (n/N - %)           | Death    | Discharged alive | Referred | Discharged against medical advice + absconded | Chi squared ( $\chi^2$ ) | P value      |
|---------------------------------------|----------|------------------|----------|-----------------------------------------------|--------------------------|--------------|
| <b>Age groups</b>                     |          |                  |          |                                               |                          |              |
| 0-27 days (neonates)                  | 16(11.3) | 108(76.6)        | 2(1.4)   | 15(10.6)                                      | 19.5                     | <b>0.021</b> |
| 1-<12 months (infants)                | 14(4.5)  | 266(85.3)        | 5(1.6)   | 27(8.7)                                       |                          |              |
| 12-59 months                          | 82(8.1)  | 823(81.1)        | 7(0.7)   | 99(9.8)                                       |                          |              |
| 5-14 years                            | 9(5.0)   | 147(81.2)        | 6(3.3)   | 19(10.5)                                      |                          |              |
| <b>Sex</b>                            |          |                  |          |                                               |                          |              |
| Male                                  | 65(6.9)  | 760(80.7)        | 15(1.6)  | 99(10.5)                                      | 5                        | 0.171        |
| Female                                | 57(7.9)  | 595(82.6)        | 5(0.7)   | 62(8.6)                                       |                          |              |
| <b>MUAC</b>                           |          |                  |          |                                               |                          |              |
| Below 11.5cm                          | 12(10.7) | 87(77.7)         | 0(0.0)   | 12(10.7)                                      | 3.7                      | 0.294        |
| Above 11.5cm                          | 78(6.8)  | 950(82.8)        | 10(0.9)  | 107(9.3)                                      |                          |              |
| <b>WFA</b>                            |          |                  |          |                                               |                          |              |
| < -2 SD                               | 48(9.3)  | 405(78.5)        | 7(1.4)   | 54(10.5)                                      | 8.7                      | <b>0.034</b> |
| >-2 SD                                | 58(5.8)  | 845(84.0)        | 9(0.9)   | 92(9.1)                                       |                          |              |
| <b>HFA</b>                            |          |                  |          |                                               |                          |              |
| < -2 SD                               | 17(7.1)  | 191(80.3)        | 2(0.8)   | 27(11.3)                                      | 0.9                      | 0.828        |
| >-2 SD                                | 77(6.7)  | 937(81.9)        | 15(1.3)  | 113(9.9)                                      |                          |              |
| <b>WFH</b>                            |          |                  |          |                                               |                          |              |
| < -2 SD                               | 43(8.0)  | 437(81.4)        | 3(0.6)   | 54(10.1)                                      | 7.3                      | 0.064        |
| >-2 SD                                | 23(4.5)  | 438(85.9)        | 5(1.0)   | 42(8.2)                                       |                          |              |
| <b>Proximity of residence to KGH</b>  |          |                  |          |                                               |                          |              |
| Within 1 km                           | 32(6.0)  | 460(86.1)        | 3(0.6)   | 39(7.3)                                       | 7.7                      | <b>0.052</b> |
| More than 1 km                        | 69(7.9)  | 702(80.1)        | 10(1.1)  | 91(10.4)                                      |                          |              |
| <b>Time of presentation/admission</b> |          |                  |          |                                               |                          |              |
| Before 4 pm                           | 94(8.0)  | 963(82.2)        | 8(0.7)   | 105(9.0)                                      | 15.1                     | <b>0.002</b> |
| After 4 pm                            | 21(4.6)  | 367(80.7)        | 10(2.2)  | 54(11.9)                                      |                          |              |
| <b>Day of admission</b>               |          |                  |          |                                               |                          |              |
| Within weekdays                       | 90(7.3)  | 1003(81.5)       | 17(1.4)  | 119(9.7)                                      | 1.3                      | 0.74         |
| Outside weekdays                      | 32(7.4)  | 352(81.7)        | 3(0.7)   | 42(9.7)                                       |                          |              |
| <b>Hospital stay</b>                  |          |                  |          |                                               |                          |              |
| Within 7 days                         | 107(7.5) | 1169(82.4)       | 18(1.3)  | 124(8.7)                                      | 10.3                     | <b>0.017</b> |

---

|                  |         |           |        |          |
|------------------|---------|-----------|--------|----------|
| More than 7 days | 14(5.9) | 185(78.1) | 2(0.8) | 36(15.2) |
|------------------|---------|-----------|--------|----------|

---

## Risk of death

Children aged under-five years ( $p < 0.01$ ), those underweight ( $p = 0.03$ ), or who presented with danger signs ( $p = 0.009$ ) had a higher risk of death than children without these features (Table 4). The risk of death was greatest within 48 hours of admission and gradually tapered off after this time point (Figure 4).

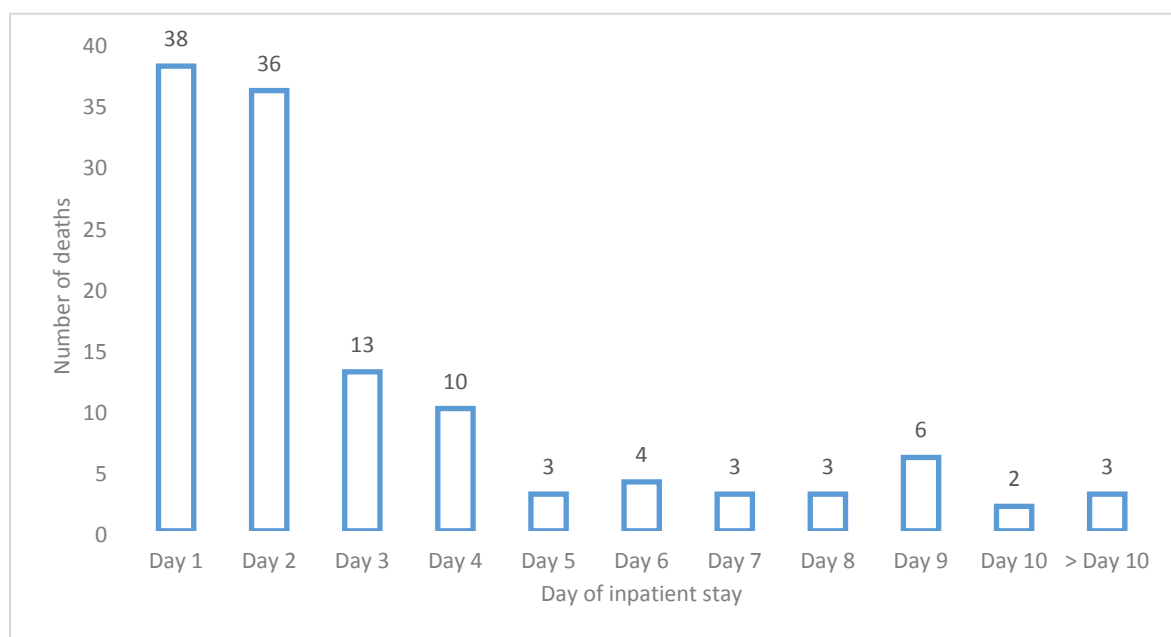

**Figure 4:** Time-to-death for admissions during the first 10 days of inpatient stay, KGH, 2019-2021



**Table 4: Risk factors for deaths among paediatric inpatients in KGH, 2019-2021**

|                                       | n/N (%) Deaths | Unadjusted OR (95% CI) | P     | Adjusted OR (95% CI) | P                |
|---------------------------------------|----------------|------------------------|-------|----------------------|------------------|
| <b>Age groups</b>                     |                |                        |       |                      |                  |
| 0-27 days (neonates)                  | 16/141(11.3%)  | 1.00(ref)              | 0.025 | 1.00(ref)            | <b>&lt;0.001</b> |
| 1-<12 months (infants)                | 14/312(4.5%)   | 0.37(0.17-0.77)        |       | 0.22(0.09-0.52)      |                  |
| 12-59 months                          | 82/1015(8.1%)  | 0.69(0.39-1.21)        |       | 0.62(0.31-1.23)      |                  |
| 5-14 years                            | 9/181(5.0%)    | 0.41(0.17-0.96)        |       | 0.35(0.14-0.86)      |                  |
| <b>Sex</b>                            |                |                        |       |                      |                  |
| Male                                  | 65/942(6.9%)   | 1.00(ref)              | 0.431 | -                    | -                |
| Female                                | 57/720(7.9%)   | 1.16(0.80-1.68)        |       | -                    | -                |
| <b>Nutritional status</b>             |                |                        |       |                      |                  |
| <b>MUAC</b>                           |                |                        |       |                      |                  |
| Below 11.5cm                          | 12/112(10.7%)  | 1.00(ref)              | 0.128 | -                    | -                |
| Above 11.5cm                          | 78/1148(6.8%)  | 0.61(0.32-1.15)        |       | -                    | -                |
| <b>WFA</b>                            |                |                        |       |                      |                  |
| < -2 SD                               | 48/516(9.3%)   | 1.00(ref)              | 0.007 | 1.00(ref)            | 0.249            |
| >-2 SD                                | 58/1006(5.8%)  | 0.60(0.40-0.89)        |       | 0.74 (0.48-1.15)     |                  |
| Missing                               | 16/141(11.3%)  | 1.25(0.69-2.27)        |       | 1.24(0.60-2.56)      |                  |
| <b>HFA</b>                            |                |                        |       |                      |                  |
| < -2 SD                               | 17/238(7.1%)   | 1.00(ref)              | 0.175 | -                    | -                |
| >-2 SD                                | 77/1144(6.7%)  | 0.94(0.54-1.62)        |       | -                    | -                |
| Missing                               | 28/281(10.0%)  | 1.44(0.77-2.70)        |       | -                    | -                |
| <b>WFH</b>                            |                |                        |       |                      |                  |
| < -2 SD                               | 43/537(8.0%)   | 1.00(ref)              | 0.01  | 1.00(ref)            | <b>0.029</b>     |
| >-2 SD                                | 23/510(4.5%)   | 0.54(0.32-0.91)        |       | 0.54 (0.31-0.95)     |                  |
| Missing                               | 56/616(9.1%)   | 1.15(0.76-1.74)        |       | 1.18 (0.71-1.97)     |                  |
| <b>Proximity of residence to KGH</b>  |                |                        |       |                      |                  |
| Within 1 km                           | 32/534(6.0%)   | 1.00(ref)              | 0.185 | -                    | -                |
| More than 1 km                        | 69/876(7.9%)   | 1.34(0.87-2.07)        |       | -                    | -                |
| <b>Time of presentation/admission</b> |                |                        |       |                      |                  |
| Before 4 pm                           | 94/1171(8.0%)  | 1.00(ref)              | 0.017 | 1.00(ref)            | <b>0.011</b>     |
| After 4 pm                            | 21/455(4.6%)   | 0.55(0.34-0.90)        |       | 0.52 (0.32-0.86)     |                  |
| <b>Day of admission</b>               |                |                        |       |                      |                  |
| Within weekdays                       | 90/1231(7.3%)  | 1.00(ref)              | 0.938 | -                    | -                |
| Outside weekdays                      | 32/431(7.4%)   | 1.02(0.67-1.55)        |       | -                    | -                |

|                                       |                |                 |        |   |                  |              |
|---------------------------------------|----------------|-----------------|--------|---|------------------|--------------|
| Hospital stay                         |                |                 |        |   |                  |              |
| Within 7 days                         | 107/1419(7.5%) | 1.00(ref)       |        |   |                  |              |
| More than 7 days                      | 14/237(5.9%)   | 0.77(0.43-1.37) | 0.372  | - |                  | -            |
| Presence of at least one danger sign* |                |                 |        |   |                  |              |
| No danger sign                        | 14/449(3.1%)   | 1.00(ref)       |        |   | 1.00(ref)        |              |
| At least one danger sign              | 108/1214(8.9%) | 3.03(1.72-5.35) | <0.001 |   | 3.10 (1.70-5.63) | <b>0.009</b> |

## Discussion

We developed and implemented a simple tool to improve the documentation of paediatric admissions and clinical outcomes in a resource-constrained, rural hospital in northern Sierra Leone. Under-five male children constituted the majority of the children admitted to the hospital during the implementation of the tool. These demographic features are consistent with findings obtained from studies conducted in similar settings. [18, 19] Higher admission rates of boys to the hospitals in these studies were attributed to an increased vulnerability of male children to some illnesses and the prevalent African custom of placing a higher premium on care of a male child compared with a female child, because of the relatively higher social importance attached to a male child. [20] Nevertheless, the gender disparity in the admission rate was not identified as a risk factor for death in our study population. This finding differs from previous studies conducted in similar settings where mortality in some studies was higher in females [18, 21, 22] and higher in males in other studies. [19, 23]

Although, severe acute malnutrition (SAM) was not a major, primary cause of admission among the hospitalised children in our study, about a third of the children had wasting and were underweight. This nutritional status is typical of the features commonly seen in similar African settings where low rates of exclusive breastfeeding and incorrect complementary feeding practices are prevalent. [24] The difference observed in the proportions of children diagnosed with SAM based on the anthropometric findings in the population of hospitalised children could be explained by the different methods used in arriving at the diagnosis. Whilst middle-upper arm circumference (MUAC) is the anthropometric measurement recommended for the diagnosis of SAM in under-five children, [25] the use of WFH z-scores could pose diagnostic challenges to hospital staff in rural settings and might lead to variations in the proportion of children identified with SAM.

A majority of the children in our study lived more than 1 km from the hospital, although this did not translate to late presentation to the hospital. This might be because commercial motorcycles taxis,

the most common means of transport in the study community, were readily available across the community and could be used to take a sick child to the hospital. More than 70% of the children presented at the hospital before 4pm and during weekdays. These findings are consistent with the results of a Gambian study. [26]

Admission into the paediatric ward followed the seasonal pattern that has been widely reported in many African settings [27-32]. This is mainly because malaria still remains the leading cause of hospitalisations in these endemic countries, and given that malaria transmission is driven by environment factors such as rainfall, it is not surprising that a rise in admissions was observed during the rainy seasons. [33]

Owing to the rural location of the study hospital, which is not connected to the national electricity grid and depends largely on electricity supply from generators to power essential life-saving equipment, a point-of-care test was the major laboratory investigation deployed to confirm clinical suspicions of malaria. Similarly, because of the limited diagnostic facilities, the diagnosis of common childhood diseases such as pneumonia and meningitis depended on clinical symptoms and signs. This practice is consistent with the WHO guidelines recommendations in the integrated management of childhood illnesses that do not focus on a single diagnosis, but on selected signs and symptoms to guide rational treatment. [34] These guidelines have improved the case-management skills of health workers in settings such as Kambia. [35]

As expected, malaria was the leading cause of paediatric admissions during the course of the tool implementation. Manifestations of severe malaria and its complications including cerebral malaria, prostration, severe malaria anaemia, and complex febrile convulsions were consistent with findings of similar studies conducted in malaria endemic countries in sub-Saharan Africa [18, 23, 28-30]; and lend credence to a WHO report that progress in malaria control has stalled despite the considerable achievements recorded in the last two decades. [36]

More than 80% of the children enrolled in this study were treated successfully and discharged home.

This is a direct reflection of the improvement in the care provided by the hospital staff who were trained in Emergency Triage, Assessment and Treatment plus (ETAT+) – a WHO recommended training package to support the poorest and most vulnerable children in rural and peri-urban areas.

[37] The training programme was complemented by the paediatric personnel employed to work in the hospital by the EBOVAC-Salone project to ensure appropriate clinical care for children enrolled in the Ebola vaccine trial. Improved clinical care has been a major benefit of hosting clinical trials in African communities but sustainability of the quality of care beyond the lifespan of the projects is usually a challenge. [38, 39]

Death was recorded in 7% of the children, the leading cause of which was severe malaria. Being an under-five child, wasted (i.e. WFH <-2SD), and having at least one danger sign were risk factors for death among the children. These factors resonate with findings of similar studies conducted in Africa [18, 22, 23] and underscore the need for improved nutritional support for children and better health-seeking behaviours of parents and caregivers of under-five children.

Contrary to the findings of a nation-wide survey on the impact of COVID-19 pandemic, which reported a slight reduction in the hospital utilisations but no significant changes in paediatric admissions across Sierra Leone [17], we observed a substantial reduction in the paediatric admissions during the COVID-19 pandemic, especially during the period shortly after the first national lockdown in Sierra Leone. The reason for this disparity is not known, but it might be connected with the design of the national survey which focused on a specific time point during the early phase of the pandemic. Although, children have been reported to carry a low risk of morbidity and mortality from COVID-19, reduction in the hospital admissions during COVID-19 pandemic led to planned health service re-configurations, with prioritisation of COVID-19 infection, and reduction of non-essential services, unplanned service disruption and changes in health-seeking behaviour. [17]

Our study had a few limitations. First, the clinical diagnoses were based almost entirely on clinical judgment with very limited laboratory support. Second, although it was documented that malaria was by far the most important cause of admission to the paediatric ward of Kambia hospital, clinical staff had not had enough experience, or had sufficient laboratory support, to allocate all hospital admissions with severe malaria to one of WHO recommended subgroups of this condition. Third, there were some missing data for anthropometric indices of the children. It is possible that these anthropometric measurements were taken by the ward staff, but were not recorded. Also, the proximity of the hospital to the homes of some children could not be estimated because their parents/caregivers did not provide specific home addresses, making it difficult to estimate the distance between their homes and the hospital. Nevertheless, the overall response rate of about 80% of children admitted to the ward during this study enabled us to demonstrate that the challenges of lack of systematic documentation of medical histories and poor record keeping of hospital admissions and outcomes can be overcome with a simple tool. Following successful implementation, the tool was adopted by the management of the hospital as the standard method of record keeping for the paediatric ward and has been adapted for other wards in the hospital.

## Conclusion

We developed and implemented a simple tool for documentations of paediatric admissions and outcomes at a rural hospital in a resource-limited setting. We found that severe malaria remains the leading cause of admission and mortality among the hospitalised children and advocate continuous use of the tool to improve paediatric care services delivery.

## Acknowledgements

We thank the staff and management of Kambia Government Hospital, Kambia District Health Management Team, the EBOVAC-Salone study team, the visiting paediatricians, expert trainers who

supported the paediatric team, the COMAHS and LSHTM project management teams for logistical, administrative and management support. We thank all study participants and their families.

## Funding

This study was supported by the EBOVAC-Salone project which was sponsored by Janssen Vaccines & Prevention BV. This project received funding from the Innovative Medicines Initiative 2 Joint Undertaking under grant agreement No 800176. This Joint Undertaking receives support from the European Union's Horizon 2020 research and innovation programme and the European Federation of Pharmaceutical Industries and Association.

## Author contributions

MOA conceptualised the study and developed the tool. MOA, HHA and BK coordinated the data collection. YN, DK, ABJ, ES, and LO handled the data management. PA performed the statistical analysis. MOA wrote the first draft of the manuscript. BG supervised the study implementation, revised the tool and reviewed the early drafts of the manuscript. All authors reviewed the manuscript for substantial intellectual inputs and approved the final version of the manuscript for submission.

**Competing interests:** None declared

## References

1. Sierra Leone (SLE) - Demographics, Health & Infant Mortality. Retrieved from <https://data.unicef.org/country/sle/> . Accessed 23 July 2022.
2. African Health Stats. Retrieved from <https://www.africanhealthstats.org/>. Accessed 10 Nov 2021.
3. UN Inter-agency Group for Child Mortality Estimation. Retrieved from <https://childmortality.org/data/Sierra%20Leone>. Accessed 10 November 2021.
4. O'Hare B. Weak health systems and Ebola. *The Lancet Global Health*. 2015;3(2):e71-e2. doi: 10.1016/S2214-109X(14)70369-9.
5. Robinson C. Primary health care and family medicine in Sierra Leone. *Afr J Prim Health Care Fam Med*. 2019;11(1):e1-e3. doi: 10.4102/phcfm.v11i1.2051. PubMed PMID: 31368324.
6. Tuti T, Bitok M, Malla L, Paton C, Muinga N, Gathara D, et al. Improving documentation of clinical care within a clinical information network: an essential initial step in efforts to understand and

- improve care in Kenyan hospitals. *BMJ Glob Health*. 2016;1(1):e000028. Epub 2016/07/12. doi: 10.1136/bmjgh-2016-000028. PubMed PMID: 27398232; PubMed Central PMCID: PMC4934599.
7. Nolan T, Angos P, Cunha AJ, Muhe L, Qazi S, Simoes EA, et al. Quality of hospital care for seriously ill children in less-developed countries. *Lancet* (London, England). 2001;357(9250):106-10. Epub 2001/02/24. doi: 10.1016/s0140-6736(00)03542-x. PubMed PMID: 11197397.
  8. English M, Mwaniki P, Julius T, Chepkirui M, Gathara D, Ouma PO, et al. Hospital Mortality - a neglected but rich source of information supporting the transition to higher quality health systems in low and middle income countries. *BMC Med*. 2018;16(1):32-. doi: 10.1186/s12916-018-1024-8. PubMed PMID: 29495961.
  9. English M, Ntoburi S, Wagai J, Mbindyo P, Opiyo N, Ayieko P, et al. An intervention to improve paediatric and newborn care in Kenyan district hospitals: understanding the context. *Implement Sci*. 2009;4:42-. doi: 10.1186/1748-5908-4-42. PubMed PMID: 19627588.
  10. Ayieko P, Ntoburi S, Wagai J, Opondo C, Opiyo N, Migiro S, et al. A Multifaceted Intervention to Implement Guidelines and Improve Admission Paediatric Care in Kenyan District Hospitals: A Cluster Randomised Trial. *PLOS Medicine*. 2011;8(4):e1001018. doi: 10.1371/journal.pmed.1001018.
  11. Mooney T, Smout E, Leigh B, Greenwood B, Enria L, Ishola D, et al. EBOVAC-Salone: Lessons learned from implementing an Ebola vaccine trial in an Ebola-affected country. *Clinical trials* (London, England). 2018;15(5):436-43. Epub 2018/06/14. doi: 10.1177/1740774518780678. PubMed PMID: 29895178; PubMed Central PMCID: PMC6136072.
  12. Sierra Leone 2015 Population and Housing Census Thematic Report on Mortality. Retrieved from <https://sierraleone.unfpa.org/sites/default/files/pub-pdf/Mortality%20report.pdf>. Accessed 19 Sep 2021.
  13. Diaz T, George AS, Rao SR, Bangura PS, Baimba JB, McMahan SA, et al. Healthcare seeking for diarrhoea, malaria and pneumonia among children in four poor rural districts in Sierra Leone in the context of free health care: results of a cross-sectional survey. *BMC Public Health*. 2013;13:157-. doi: 10.1186/1471-2458-13-157. PubMed PMID: 23425576.
  14. Sierra Leone 2015 Population and Housing Census SUMMARY OF FINAL RESULTS. Retrieved from [https://www.statistics.sl/images/StatisticsSL/Documents/final-results\\_-\\_2015\\_population\\_and\\_housing\\_census.pdf](https://www.statistics.sl/images/StatisticsSL/Documents/final-results_-_2015_population_and_housing_census.pdf). Accessed 19 Sep 2021.
  15. Afolabi MO, Ishola D, Manno D, Keshinro B, Bockstal V, Rogers B, et al. Safety and immunogenicity of the two-dose heterologous Ad26.ZEBOV and MVA-BN-Filo Ebola vaccine regimen in children in Sierra Leone: a randomised, double-blind, controlled trial. *The Lancet Infectious diseases*. 2021. Epub 2021/09/17. doi: 10.1016/s1473-3099(21)00128-6. PubMed PMID: 34529962.
  16. Ishola D, Manno D, Afolabi MO, Keshinro B, Bockstal V, Rogers B, et al. Safety and long-term immunogenicity of the two-dose heterologous Ad26.ZEBOV and MVA-BN-Filo Ebola vaccine regimen in adults in Sierra Leone: a combined open-label, non-randomised stage 1, and a randomised, double-blind, controlled stage 2 trial. *The Lancet Infectious Diseases*. doi: 10.1016/S1473-3099(21)00125-0.
  17. Sevalie S, Youkee D, van Duinen AJ, Bailey E, Bangura T, Mangipudi S, et al. The impact of the COVID-19 pandemic on hospital utilisation in Sierra Leone. *BMJ Glob Health*. 2021;6(10):e005988. doi: 10.1136/bmjgh-2021-005988. PubMed PMID: 34635552.
  18. Ahmed MAA, Musa IR, Mahgoub HM, Al-Nafeesah A, Al-Wutayd O, Adam I. Patterns, Outcomes and Predictors of Pediatric Medical Admissions at Gadarif Hospital in Eastern Sudan. *Front Pediatr*. 2022;10. doi: 10.3389/fped.2022.764028.
  19. Okoronkwo NC, Onyearugha CN, Ohanenye CA. Pattern and outcomes of paediatric medical admissions at the Living Word Mission Hospital, Aba, South East Nigeria. *The Pan African medical journal*. 2018;30:202. Epub 2018/12/24. doi: 10.11604/pamj.2018.30.202.15966. PubMed PMID: 30574221; PubMed Central PMCID: PMC6296677.
  20. Hon KL, Nelson EA. Gender disparity in paediatric hospital admissions. *Annals of the Academy of Medicine, Singapore*. 2006;35(12):882-8. Epub 2007/01/16. PubMed PMID: 17219000.



21. Misganaw A, Mariam DH, Araya T, Ayele K. Patterns of mortality in public and private hospitals of Addis Ababa, Ethiopia. *BMC Public Health*. 2012;12:1007. Epub 2012/11/22. doi: 10.1186/1471-2458-12-1007. PubMed PMID: 23167315; PubMed Central PMCID: PMC3520706.
22. Lugangira K, Kazaura M, Kalokola F. Morbidity and mortality of children aged 2-59 months admitted in the Tanzania Lake Zone's public hospitals: a cross-sectional study. *BMC research notes*. 2017;10(1):502. Epub 2017/10/12. doi: 10.1186/s13104-017-2818-z. PubMed PMID: 29017588; PubMed Central PMCID: PMC5634853.
23. Mouneke U, Ibekwe RC, Eke C, Ibekwe M, Chinawa J. Mortality among paediatric inpatients in Mile 4 Mission hospital Abakaliki, south-eastern Nigeria: A retrospective study. *Nigerian journal of paediatrics*. 2013;40:259-63.
24. Gachau S, Irimu G, Ayieko P, Akech S, Agweyu A, English M, et al. Prevalence, outcome and quality of care among children hospitalized with severe acute malnutrition in Kenyan hospitals: A multi-site observational study. *PLoS One*. 2018;13(5):e0197607-e. doi: 10.1371/journal.pone.0197607. PubMed PMID: 29771994.
25. World Health Organization. Nutrition: Guideline: updates on the management of severe acute malnutrition in infants and children, 2013: World Health Organization; 2013. Available from: [http://apps.who.int/iris/bitstream/10665/95584/1/9789241506328\\_eng.pdf?ua=1](http://apps.who.int/iris/bitstream/10665/95584/1/9789241506328_eng.pdf?ua=1). Accessed 4 April 2022.
26. Okomo UA, Dibbasey T, Kassama K, Lawn JE, Zaman SM, Kampmann B, et al. Neonatal admissions, quality of care and outcome: 4 years of inpatient audit data from The Gambia's teaching hospital. *Paediatrics and international child health*. 2015;35(3):252-64. Epub 2015/06/09. doi: 10.1179/2046905515y.0000000036. PubMed PMID: 26052891.
27. Forae GD, Uchendu OJ, Igbe AP. An audit of paediatric mortality patterns in a Nigerian teaching hospital. *Nigerian Medical Journal : Journal of the Nigeria Medical Association*. 2014;55:130 - 3.
28. Toma BO, Gyang MD, Abdu H, Shwe DD, Ekere I, Ihekaike MM. Paediatric Morbidity and Mortality in a Suburban Hospital in Jos, North -Central Nigeria. *International Journal of Tropical Disease & Health*. 2015;5:156-64.
29. Oninla SO, Fadugbagbe AO, Oninla OA, Otetubi OA. Pattern of childhood morbidities and outcome of childhood admissions in a Nigerian public secondary healthcare facility. *Annals of Health Research*. 2018.
30. Tsai C, Walters CB, Sampson J, Kateh F, Chang MP. Pediatric Mortality in a Rural Tertiary Care Center in Liberia. *Children (Basel, Switzerland)*. 2017;4(2). Epub 2017/02/02. doi: 10.3390/children4020008. PubMed PMID: 28146099; PubMed Central PMCID: PMC5332910.
31. Moise IK. Causes of Morbidity and Mortality among Neonates and Children in Post-Conflict Burundi: A Cross-Sectional Retrospective Study. *Children (Basel, Switzerland)*. 2018;5(9). Epub 2018/09/13. doi: 10.3390/children5090125. PubMed PMID: 30205549; PubMed Central PMCID: PMC6162533.
32. Sanyang Y. Prevalence of under-five years of age mortality by infectious diseases in West African region. *International Journal of Africa Nursing Sciences*. 2019;11:100175. doi: <https://doi.org/10.1016/j.ijans.2019.100175>.
33. Karuri SW, Snow RW. Forecasting paediatric malaria admissions on the Kenya Coast using rainfall. *Global health action*. 2016;9:29876. Epub 2016/02/05. doi: 10.3402/gha.v9.29876. PubMed PMID: 26842613; PubMed Central PMCID: PMC4740093.
34. Integrated management of childhood illness: conclusions. WHO Division of Child Health and Development. *Bull World Health Organ*. 1997;75 Suppl 1(Suppl 1):119-28. Epub 1997/01/01. PubMed PMID: 9529725; PubMed Central PMCID: PMC2486994.
35. Gove S. Integrated management of childhood illness by outpatient health workers: technical basis and overview. The WHO Working Group on Guidelines for Integrated Management of the Sick

Child. Bull World Health Organ. 1997;75 Suppl 1(Suppl 1):7-24. Epub 1997/01/01. PubMed PMID: 9529714; PubMed Central PMCID: PMC2486995.

36. World malaria report 2020: 20 years of global progress and challenges. Geneva: World Health Organization; 2020. Licence: CC BY-NC-SA 3.0 IGO.

37. Emergency Triage, Assessment and Treatment plus (ETAT+). Retrieved from <https://www.rcpch.ac.uk/resources/emergency-triage-assessment-treatment-plus-etat-online-learning>. Accessed 04 April 2022.

38. Millum J. Sharing the benefits of research fairly: two approaches. Journal of Medical Ethics. 2012;38(4):219-23. doi: 10.1136/medethics-2011-100118.

39. Ndwandwe DE, Dube K, Mathebula L, Wiysonge CS. Description of vaccine clinical trials in Africa: a narrative review. Human Vaccines & Immunotherapeutics. 2019;16:972 - 80.

### **List of figure and table legends**

Table 1: Socio-demographic characteristics of study participants, KGH, 2019-2021

Table 2: Primary diagnoses among children admitted to KGH, 2019-2021

Table 3. Clinical outcomes of children admitted to the paediatric ward, KGH, 2019-2021

Table 4: Risk factors for deaths among paediatric inpatients in KGH, 2019-2021

Figure 1: Seasonal pattern of admissions to the KGH paediatric ward, Aug 2019-Jul 2021

Figure 2: Impact of COVID-19 pandemic on admissions among study participants, KGH, 2019-2021

Figure 3: Clinical diagnoses among study participants, KGH, 2019-2021

Figure 4: Time-to-death for admissions during the first 10 days of inpatient stay, KGH, 2019-2021

Supplementary file S1: Audit tool
